# Supplementary material for: The cytosolic entry of diphtheria toxin catalytic domain requires a host cell cytosolic translocation factor complex
Source: PubMed Central journal article supplement — J Cell Biol. 2003 Mar 31;160(7):1139–50. doi: 10.1083/jcb.200210028 (PMC2172777; doi:10.1083/jcb.200210028), 2003-03-31
Supplement: jcellbiol_jcb.200210028_2.pdf [file jcellbiol_jcb.200210028_2.pdf]

**Table SI. Summary of information-dependent acquisition tandem MS sequence data from tryptic digests of human Hsp 90 (□ and □) and yeast TrR-1 .****Human Hsp 90 □ (30% coverage MS/MS only; 70% coverage MS 1 MS/MS)**

| AA      | <i>m/z</i> (obs) | Mr(expt) | Mr(calc) | Delta | Sequence                  |
|---------|------------------|----------|----------|-------|---------------------------|
| 47–60   | 520.94           | 1559.81  | 1559.82  | 20.01 | ELISNSSDALDKIR            |
| 59–74   | 452.99           | 1807.94  | 1807.93  | 0.01  | IRYESLTDPSKLDGK           |
| 59–74   | 603.65           | 1807.93  | 1807.93  | 20.00 | IRYESLTDPSKLDGK           |
| 61–74   | 513.92           | 1538.74  | 1538.75  | 20.00 | YESLTDPSKLDGK             |
| 61–74   | 770.36           | 1538.71  | 1538.75  | 20.04 | YESLTDPSKLDGK             |
| 75–87   | 530.63           | 1588.87  | 1588.87  | 20.00 | ELHINLIPNKQDR             |
| 88–100  | 675.36           | 1348.70  | 1348.73  | 20.03 | TLTIVDTGIGMTK             |
| 183–201 | 576.06           | 2300.21  | 2300.20  | 0.00  | GTKVILHLKEDQTEYLEER       |
| 186–201 | 504.51           | 2014.01  | 2014.04  | 20.03 | VILHLKEDQTEYLEER          |
| 186–201 | 672.35           | 2014.02  | 2014.04  | 20.02 | VILHLKEDQTEYLEER          |
| 186–201 | 1007.99          | 2013.96  | 2014.04  | 20.07 | VILHLKEDQTEYLEER          |
| 284–292 | 576.28           | 1150.54  | 1150.55  | 20.01 | YIDQEELNK                 |
| 300–314 | 917.36           | 1832.70  | 1832.77  | 20.07 | NPDDITNEEYGEFYK           |
| 315–327 | 509.92           | 1526.73  | 1526.74  | 20.01 | SLTNDWEDHLAVK             |
| 315–327 | 764.35           | 1526.69  | 1526.74  | 20.05 | SLTNDWEDHLAVK             |
| 328–338 | 674.82           | 1347.63  | 1347.66  | 20.03 | HFSVEGQLEFR               |
| 339–345 | 408.26           | 814.50   | 814.51   | 20.00 | ALLFVPR                   |
| 346–355 | 422.22           | 1263.64  | 1263.64  | 0.00  | RAPFDLFENR                |
| 347–355 | 554.77           | 1107.52  | 1107.53  | 20.01 | APFDLFENR                 |
| 387–400 | 505.26           | 1512.76  | 1512.78  | 20.02 | GVVDSIDLPLNISR            |
| 387–400 | 757.36           | 1512.71  | 1512.78  | 20.07 | GVVDSIDLPLNISR            |
| 437–443 | 474.73           | 947.44   | 947.44   | 0.00  | FYEQFSK                   |
| 465–478 | 783.83           | 1565.65  | 1565.69  | 20.04 | YYTSASGDEMVSLEK           |
| 465–483 | 754.66           | 2260.94  | 2260.96  | 20.02 | YYTSASGDEMVSLEKDYCTR      |
| 500–510 | 618.30           | 1234.58  | 1234.59  | 20.01 | DQVANSADFVER              |
| 540–564 | 729.60           | 2914.37  | 2914.50  | 20.13 | TLVSVTKEGLELPEDEEEKKKQEEK |
| 547–564 | 729.68           | 2186.03  | 2186.06  | 20.03 | EGLELPEDEEEKKKQEEK        |
| 574–581 | 495.29           | 988.56   | 988.56   | 0.00  | IMKDILEK                  |
| 632–647 | 479.50           | 1913.97  | 1914.03  | 20.06 | KHLEINPDHSIETLR           |

**Human Hsp 90 □ (30% coverage MS/MS only; 65% coverage MS 1 MS/MS)**

| AA     | <i>m/z</i> (obs) | Mr(expt) | Mr(calc) | Delta | Sequence           |
|--------|------------------|----------|----------|-------|--------------------|
| 42–55  | 772.89           | 1543.77  | 1543.82  | 20.05 | ELISNASDALDKIR     |
| 54–69  | 452.99           | 1807.94  | 1807.93  | 0.01  | IRYESLTDPSKLDGK    |
| 54–69  | 603.65           | 1807.93  | 1807.93  | 20.00 | IRYESLTDPSKLDGK    |
| 54–72  | 545.54           | 2178.14  | 2178.15  | 20.01 | IRYESLTDPSKLDGKELK |
| 56–69  | 513.92           | 1538.74  | 1538.75  | 20.00 | YESLTDPSKLDGK      |
| 56–69  | 770.36           | 1538.71  | 1538.75  | 20.04 | YESLTDPSKLDGK      |
| 56–72  | 637.33           | 1908.95  | 1908.97  | 20.02 | YESLTDPSKLDGKELK   |
| 70–82  | 522.29           | 1563.85  | 1563.86  | 20.01 | ELKIDIIPNPQER      |
| 83–95  | 675.36           | 1348.70  | 1348.73  | 20.03 | TLTLVDTGIGMTK      |
| 96–107 | 622.34           | 1242.66  | 1241.70  | 0.96  | ADLNNLGTIAK (N□ D) |

|         |         |         |         |       |                         |
|---------|---------|---------|---------|-------|-------------------------|
| 178–196 | 576.06  | 2300.21 | 2300.20 | 0.00  | GTKVILHLKEDQTEYLEER     |
| 181–196 | 504.51  | 2014.01 | 2014.04 | 20.03 | VILHLKEDQTEYLEER        |
| 181–196 | 672.35  | 2014.02 | 2014.04 | 20.02 | VILHLKEDQTEYLEER        |
| 181–196 | 1007.99 | 2013.96 | 2014.04 | 20.07 | VILHLKEDQTEYLEER        |
| 276–284 | 576.28  | 1150.54 | 1150.55 | 20.01 | YIDQEELNK               |
| 292–306 | 924.37  | 1846.73 | 1846.79 | 20.06 | NPDDITQEEYGEFYK         |
| 307–319 | 509.58  | 1525.72 | 1526.74 | 21.01 | SLTNDWEDHLAVK (D□ N)    |
| 307–319 | 509.92  | 1526.73 | 1526.74 | 20.01 | SLTNDWEDHLAVK           |
| 307–319 | 764.35  | 1526.69 | 1526.74 | 20.05 | SLTNDWEDHLAVK           |
| 320–330 | 674.82  | 1347.63 | 1347.66 | 20.03 | HFSVEGQLEFR             |
| 331–337 | 415.27  | 828.52  | 828.52  | 20.00 | ALLFIPR                 |
| 338–348 | 455.58  | 1363.73 | 1363.72 | 0.00  | RAPFDLFENKK             |
| 379–392 | 505.26  | 1512.76 | 1512.78 | 20.02 | GVVDESDLPNISR           |
| 379–392 | 757.36  | 1512.71 | 1512.78 | 20.07 | GVVDESDLPNISR           |
| 429–435 | 446.22  | 890.42  | 890.42  | 0.01  | FYEAFSK                 |
| 457–475 | 731.64  | 2191.89 | 2191.93 | 20.04 | YHTSQSGDEMTSLSEYVSR     |
| 482–491 | 580.80  | 1159.58 | 1159.58 | 0.00  | SIYYITGESK              |
| 492–502 | 625.30  | 1248.58 | 1248.61 | 20.03 | EQVANSAFVER             |
| 566–573 | 495.29  | 988.56  | 988.56  | 0.00  | LMKEILDK                |
| 624–639 | 478.26  | 1909.00 | 1910.04 | 21.04 | KHLEINPDHPIVETLR (D□ N) |
| 625–639 | 594.98  | 1781.92 | 1781.94 | 20.02 | HLEINPDHPIVETLR         |
| 625–639 | 891.94  | 1781.87 | 1781.94 | 20.07 | HLEINPDHPIVETLR         |

**Yeast TrR-1 (57% coverage MS/MS only; 85% coverage MS 1 MS/MS)**

| AA      | <i>m/z</i> (obs) | Mr(expt) | Mr(calc) | Delta | Sequence                               |
|---------|------------------|----------|----------|-------|----------------------------------------|
| 1–24    | 627.60           | 2506.37  | 2506.35  | 0.02  | MVHNKVTIIGSGPAAHTAAIYLAR Oxidation (M) |
| 6–24    | 941.58           | 1881.14  | 1881.05  | 0.09  | VTIIGSGPAAHTAAIYLAR                    |
| 6–24    | 628.05           | 1881.12  | 1881.05  | 0.08  | VTIIGSGPAAHTAAIYLAR                    |
| 78–89   | 662.88           | 1323.75  | 1323.69  | 0.06  | FGTEIITETVSK                           |
| 90–98   | 510.82           | 1019.62  | 1019.57  | 0.05  | VDLSSKPFK                              |
| 99–124  | 921.80           | 2762.38  | 2762.36  | 0.01  | LWTEFNEDAEPVTTDAILLATGASAK             |
| 125–137 | 564.30           | 1689.88  | 1689.79  | 0.08  | RMHLPGEETYWQK Oxidation (M)            |
| 126–137 | 506.90           | 1517.68  | 1517.70  | 20.02 | MHLPGEETYWQK                           |
| 154–175 | 1153.13          | 2304.24  | 2304.14  | 0.10  | NKPLAVIGGGDSACEEAQFLTK                 |
| 199–217 | 726.10           | 2175.27  | 2175.18  | 0.10  | AEKNEKIEILYNTVALEAK                    |
| 205–217 | 738.96           | 1475.90  | 1475.82  | 0.08  | IEILYNTVALEAK                          |
| 205–221 | 612.00           | 1832.98  | 1832.99  | 20.01 | IEILYNTVALEAKGDGK                      |
| 205–221 | 917.54           | 1833.06  | 1832.99  | 0.07  | IEILYNTVALEAKGDGK                      |
| 233–244 | 651.36           | 1300.71  | 1300.65  | 0.06  | KNEETDLPVSGL                           |
| 233–255 | 622.85           | 2487.35  | 2487.26  | 0.09  | KNEETDLPVSGLFYAIGHTPATK                |
| 245–255 | 402.57           | 1204.69  | 1204.62  | 0.07  | FYAIGHTPATK                            |
| 245–255 | 603.35           | 1204.69  | 1204.62  | 0.06  | FYAIGHTPATK                            |
| 271–293 | 756.40           | 2266.18  | 2266.11  | 0.06  | TVPGSSLTSPGFFAAGDVQDSK                 |
| 296–313 | 890.01           | 1778.88  | 1778.93  | 20.05 | QAITSAGSGCMAALDAEK                     |

All peptide MS and MS/MS spectra were submitted to Mascot (32), and positive identifications were confirmed manually. Error tolerance was better than 50 ppm, except for three peptides, where either (N□ D) or (D□ N) conversion was observed.
